# Supplementary material for: Two-dimensional assembly of tetrahedral chalcogenide clusters with tetrakis(imidazolyl)borate ligands
Source: Royal Society of Chemistry journal article supplement (doi:10.1039/c2dt12043g), 2011-12-12
Supplement: c2dt12043g.pdf [file c2dt12043g.pdf]

## **Two-dimensional assembly of tetrahedral chalcogenide clusters with tetrakis(imidazoly)borate ligands**

Ziyi Chen,<sup>†</sup> Daibing Luo,<sup>‡</sup> Xiuchao Luo,<sup>†</sup> Maoping Kang,<sup>†</sup> and Zhien Lin<sup>†,\*</sup>

<sup>†</sup> *College of Chemistry, Sichuan University, Chengdu 610064, People's Republic of China.*

<sup>‡</sup> *Analytical & Testing Center, Sichuan University, Chengdu 610064, People's Republic of China.*

\* To whom correspondence should be addressed. Tel: +86-28-85412284. E-mail:

zhienlin@scu.edu.cn

**Figure captions:**

**Figure S1.** A view of the C1 cluster in compound **1**.

**Figure S2.** A view of the packing of layers along the [010] direction.

**Figure S3.** IR spectrum of compound **1**.

**Figure S4.** TGA curve of compound **1** in N<sub>2</sub> with a heating rate of 10 °C.

**Figure S5.** Experimental and simulated XRD patterns of compound **1**.

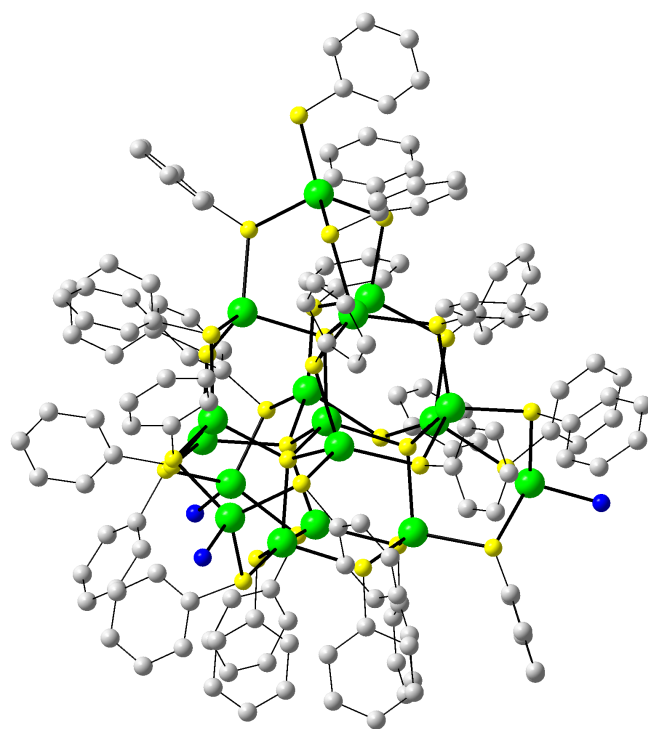

**Figure S1**

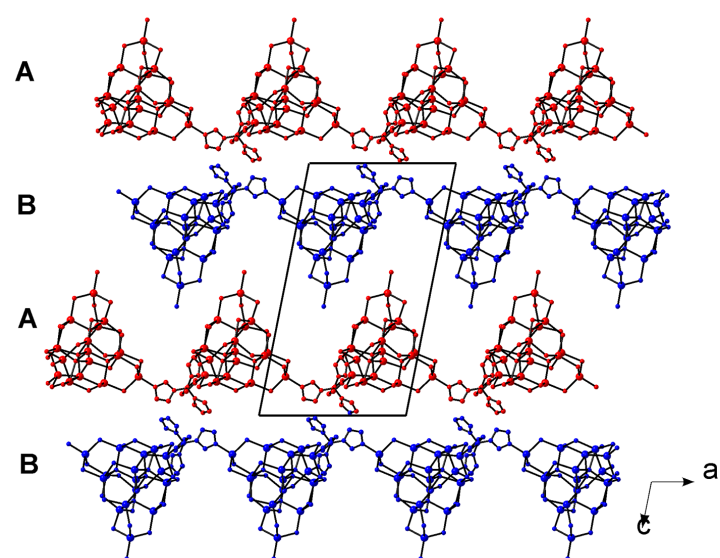

**Figure S2**

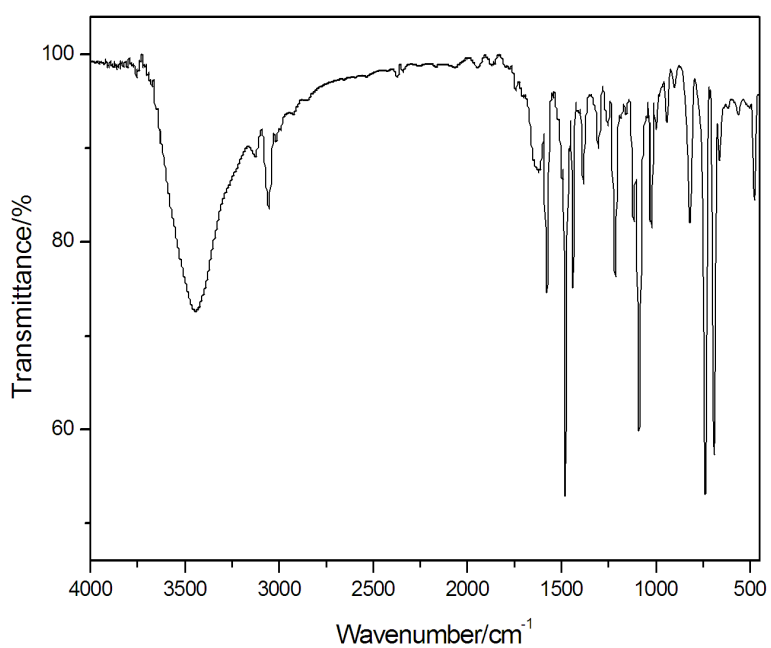

**Figure S3**

FTIR data (cm<sup>-1</sup>) : 3050 (m,  $\nu$ (=CH)), 1580 (s,  $\delta$ (C=C)), 1480 (vs,  $\delta$ (C=C)), 1440 (m,  $\delta$ (C=C)), 1210 (m,  $\nu$ (C-C)), 1090 (s,  $\nu$ (C-S)), 1020 (m,  $\nu$ (C-S)), 818 (m,  $\delta$ (=CH)), 739 (vs,  $\delta$ (=CH)), 690 (vs,  $\delta$ (=CH)).

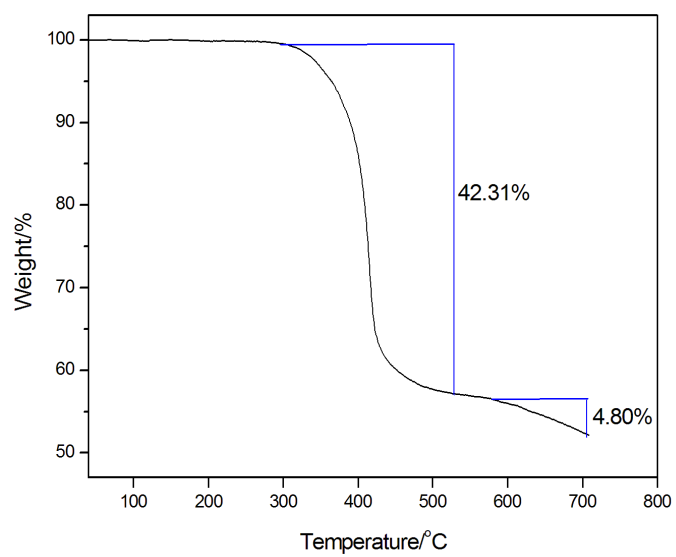

**Figure S4**

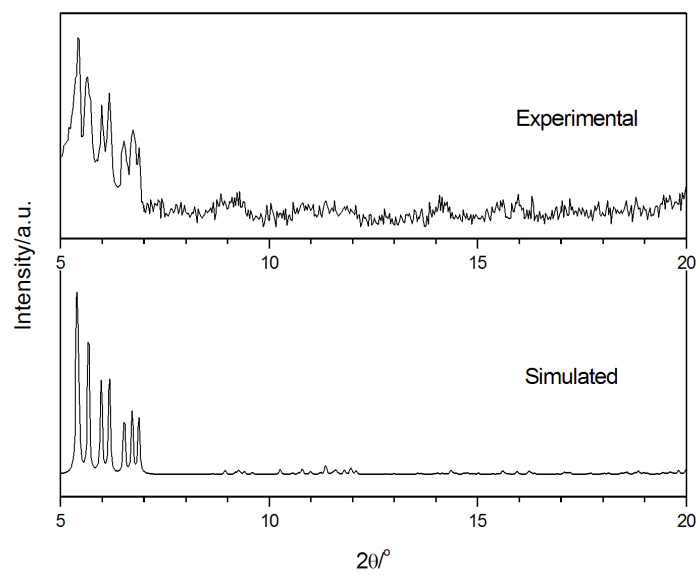

**Figure S5**
